# Supplementary material for: Correlations between [68Ga]Ga-DOTA-TOC Uptake and Absorbed Dose from [177Lu]Lu-DOTA-TATE
Source: MDPI journal article supplement (doi:10.3390/cancers15041134), 2023-02-10
Supplement: s1 [file s1]

## Supplementary Material

This file is supplementary to “Correlations between [ $^{68}\text{Ga}$ ]Ga-DOTA-TOC uptake and absorbed dose from [ $^{177}\text{Lu}$ ]Lu-DOTA-TATE”.

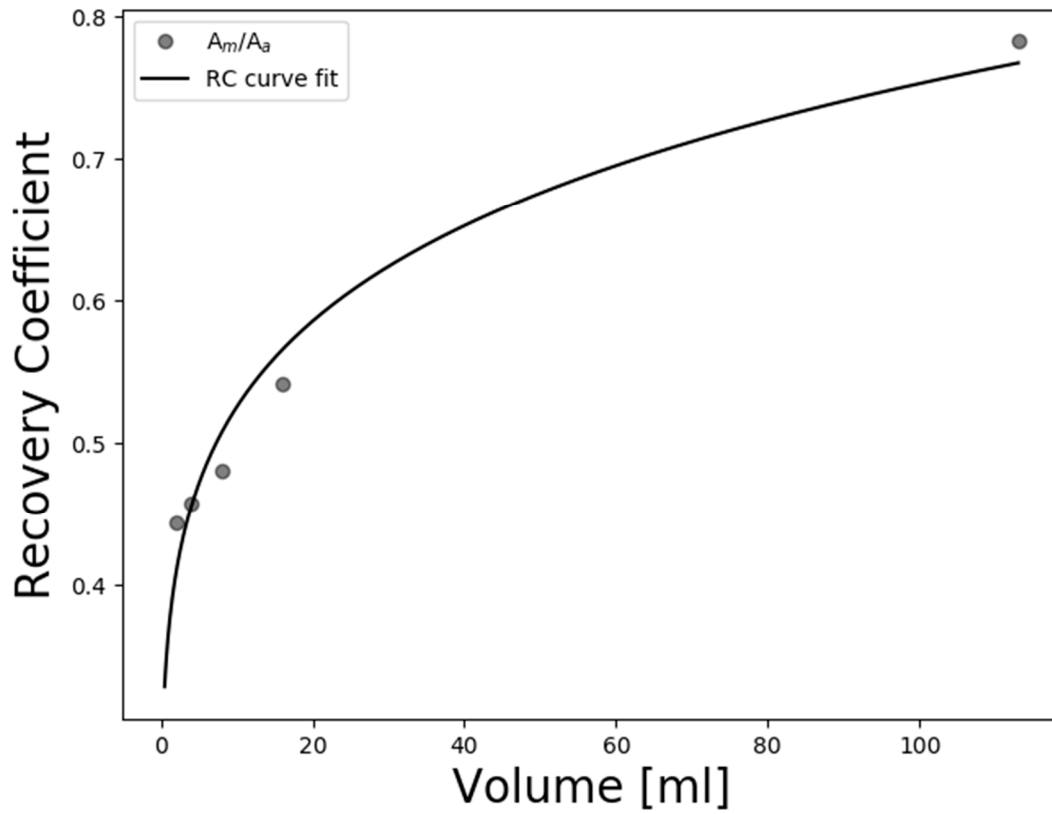

**Supplementary figure S1:** An Esser phantom with spherical inserts of 2, 4, 8, 16 and 113 ml was used to determine threshold and recovery coefficients. A threshold of 40 % was found to reproduce the volume of the inserts above 8 ml. Recovery coefficients (RCs) were derived from the same SPECT/CT phantom image by defining the ratio between measured ( $A_m$ ) and actual ( $A_a$ ) activity in the five spheres, using this 40% threshold.

The RC curve was fitted to a volume ( $v$ ) dependent sigmoid function  $RC = 1/(1 + (\alpha/v)^\beta)$  with fit parameters  $\alpha$  and  $\beta$ .

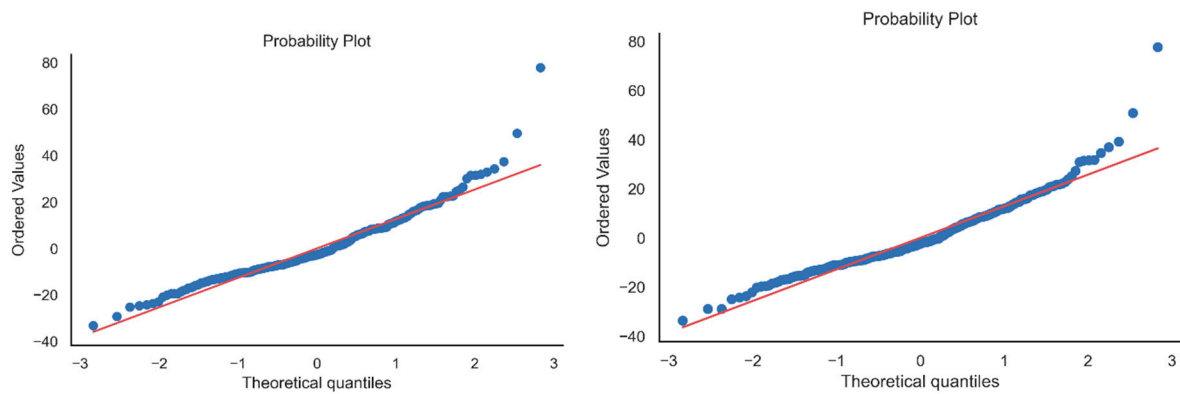

**Supplementary figure S2:** Probability plots of the residuals of the predicted and calculated absorbed dose from SUV<sub>mean</sub> (A) and SUV<sub>max</sub> (B).

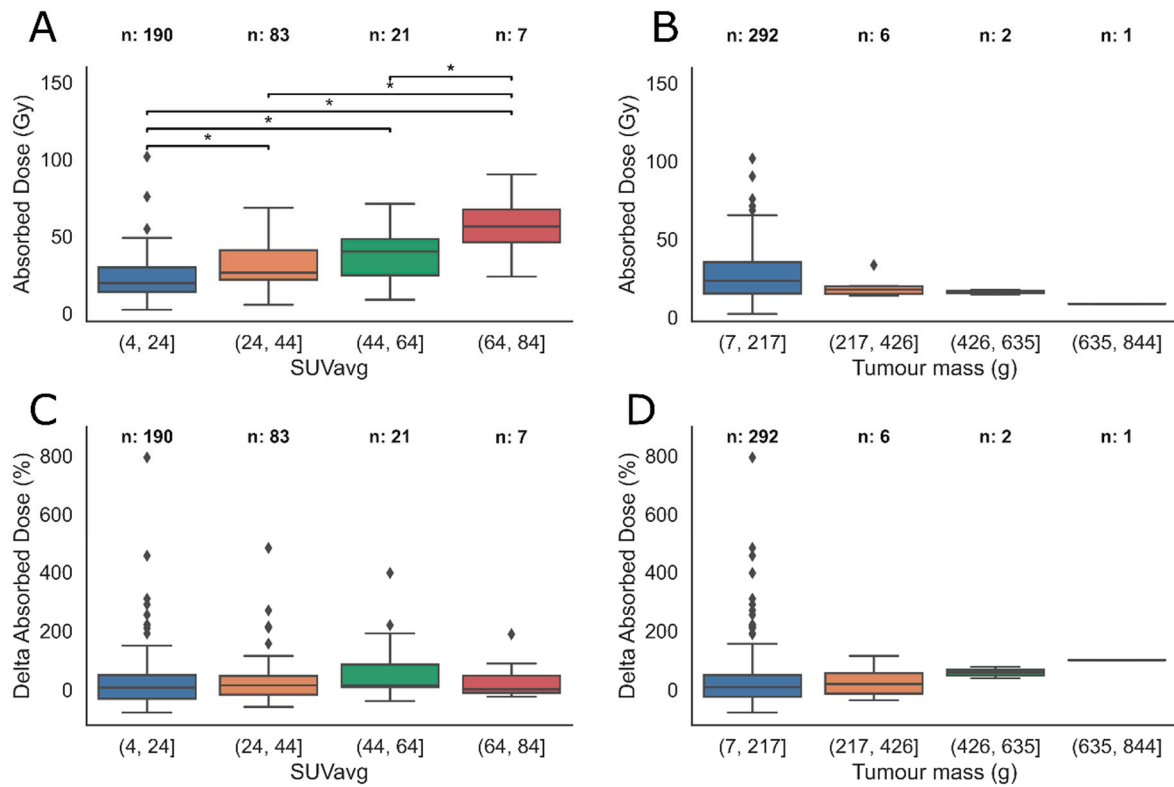

**Supplementary figure S3:** The group analysis with equal group size instead of equal range in grouping parameters. Stars indicate statistically significant differences of the group means according to the Tukey-test.
